# Supplementary material for: Fatimanols Y and Z: two neo-clerodane diterpenoids from Teucrium yemense
Source: Royal Society of Chemistry journal article supplement (doi:10.1039/d3ra06083g), 2023-01-01

# Fatimanols Y and Z: Two neo-clerodane diterpenoids from *Teucrium yemense*

Ahmed Elbermawi <sup>1,2,\*</sup>, Fazila Zulfiqar <sup>2</sup>, Ikhlas A. Khan <sup>2</sup>, Zulfiqar Ali <sup>2</sup>

<sup>1</sup> Department of Pharmacognosy, Faculty of Pharmacy, Mansoura University, Mansoura, 35516 Egypt.

<sup>2</sup> National Center for Natural Products Research, School of Pharmacy, University of Mississippi, University, MS 38677, USA.

\* Ahmed Elbermawi: [asbeder@mans.edu.eg](mailto:asbeder@mans.edu.eg); Tel.: +20 10-0481-1533

## Correspondence

**Ahmed Elbermawi Ph.D.**

Department of Pharmacognosy,  
Faculty of Pharmacy, Mansoura University, Mansoura, 35516, Egypt  
[asbeder@mans.edu.eg](mailto:asbeder@mans.edu.eg)

## Contents

- Fig. S1.** HR-ESI-MS [M-H]<sup>-</sup> spectrum of compound **1**
- Fig. S2.** <sup>1</sup>H NMR spectrum of compound **1** (CD<sub>3</sub>OD, 400 MHz)
- Fig. S3.** DEPTQ spectrum of compound **1** (CD<sub>3</sub>OD, 100 MHz)
- Fig. S4.** <sup>1</sup>H-<sup>1</sup>H COSY spectrum of compound **1** (CD<sub>3</sub>OD, 400 MHz).
- Fig. S5.** HSQC spectrum of compound **1** (CD<sub>3</sub>OD, 400 MHz).
- Fig. S6.** HMBC spectrum of compound **1** (CD<sub>3</sub>OD, 400 MHz).
- Fig. S7.** NOESY spectrum of compound **1** (CD<sub>3</sub>OD, 400 MHz).
- Fig. S8.** IR spectrum of compound **1**
- Fig. S9.** HR-ESI-MS [M-H]<sup>-</sup> spectrum of compound **2**
- Fig. S10.** <sup>1</sup>H-NMR spectrum of compound **2** (CD<sub>3</sub>OD, 400 MHz).
- Fig. S11.** DEPTQ spectrum of compound **2** (CD<sub>3</sub>OD, 100 MHz).
- Fig. S12.** <sup>1</sup>H-<sup>1</sup>H COSY spectrum of compound **2** (CD<sub>3</sub>OD, 400 MHz).
- Fig. S13.** HSQC spectrum of compound **2** (CD<sub>3</sub>OD, 400 MHz).
- Fig. S14.** HMBC spectrum of compound **2** (CD<sub>3</sub>OD, 400 MHz).
- Fig. S15.** NOESY spectrum of compound **2** (CD<sub>3</sub>OD, 400 MHz).
- Fig. S16.** IR spectrum of compound **2**
- Fig. S17.** HR-ESI-MS [M-H]<sup>-</sup> spectrum of compound **3**
- Fig. S18.** <sup>1</sup>H NMR spectrum of compound **3** (CD<sub>3</sub>OD, 400 MHz)
- Fig. S19.** DEPTQ spectrum of compound **3** (CD<sub>3</sub>OD, 100 MHz)
- Fig. S20.** <sup>1</sup>H-<sup>1</sup>H COSY spectrum of compound **3** (CD<sub>3</sub>OD, 400 MHz).
- Fig. S21.** HSQC spectrum of compound **3** (CD<sub>3</sub>OD, 400 MHz).
- Fig. S22.** HMBC spectrum of compound **3** (CD<sub>3</sub>OD, 400 MHz).
- Fig. S23.** HR-ESI-MS [M-H]<sup>-</sup> spectrum of compound **4**
- Fig. S24.** <sup>1</sup>H NMR spectrum of compound **4** (CD<sub>3</sub>OD, 400 MHz)
- Fig. S25.** DEPTQ spectrum of compound **4** (CD<sub>3</sub>OD, 100 MHz)
- Fig. S26.** HR-ESI-MS [M+Na]<sup>+</sup> spectrum of compound **5**
- Fig. S27.** <sup>1</sup>H NMR spectrum of compound **5** (CD<sub>3</sub>OD, 400 MHz)
- Fig. S28.** DEPTQ spectrum of compound **5** (CD<sub>3</sub>OD, 100 MHz)
- Fig. S29.** <sup>1</sup>H-<sup>1</sup>H COSY spectrum of compound **5** (CD<sub>3</sub>OD, 400 MHz).
- Fig. S30.** HSQC spectrum of compound **5** (CD<sub>3</sub>OD, 400 MHz).
- Fig. S31.** HMBC spectrum of compound **5** (CD<sub>3</sub>OD, 400 MHz).
- Fig. S32.** Schematic isolation of the compounds (**1-5**) from the aerial parts of *T. yemense*
- Fig. S33.** HPLC chromatograms of compounds **1** and **2**
- Fig. S34.** Experimental ECD spectrum of compound **1**
- Fig. S35.** Experimental ECD spectrum of compound **2**

**Fig. S1.** HR-ESI-MS [M-H]<sup>-</sup> spectrum of compound **1**

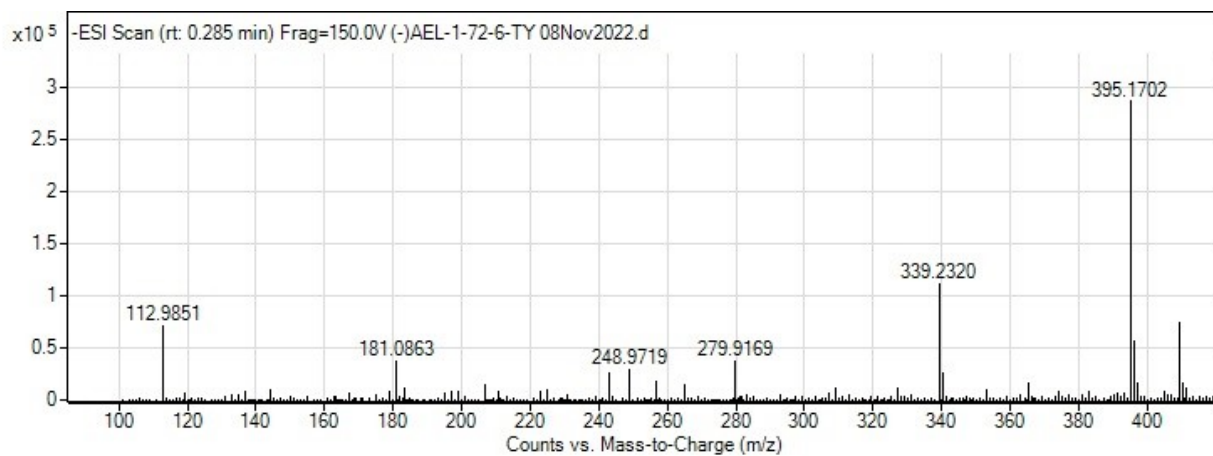

**Fig. S2.** <sup>1</sup>H NMR spectrum of compound **1** (CD<sub>3</sub>OD, 400 MHz)

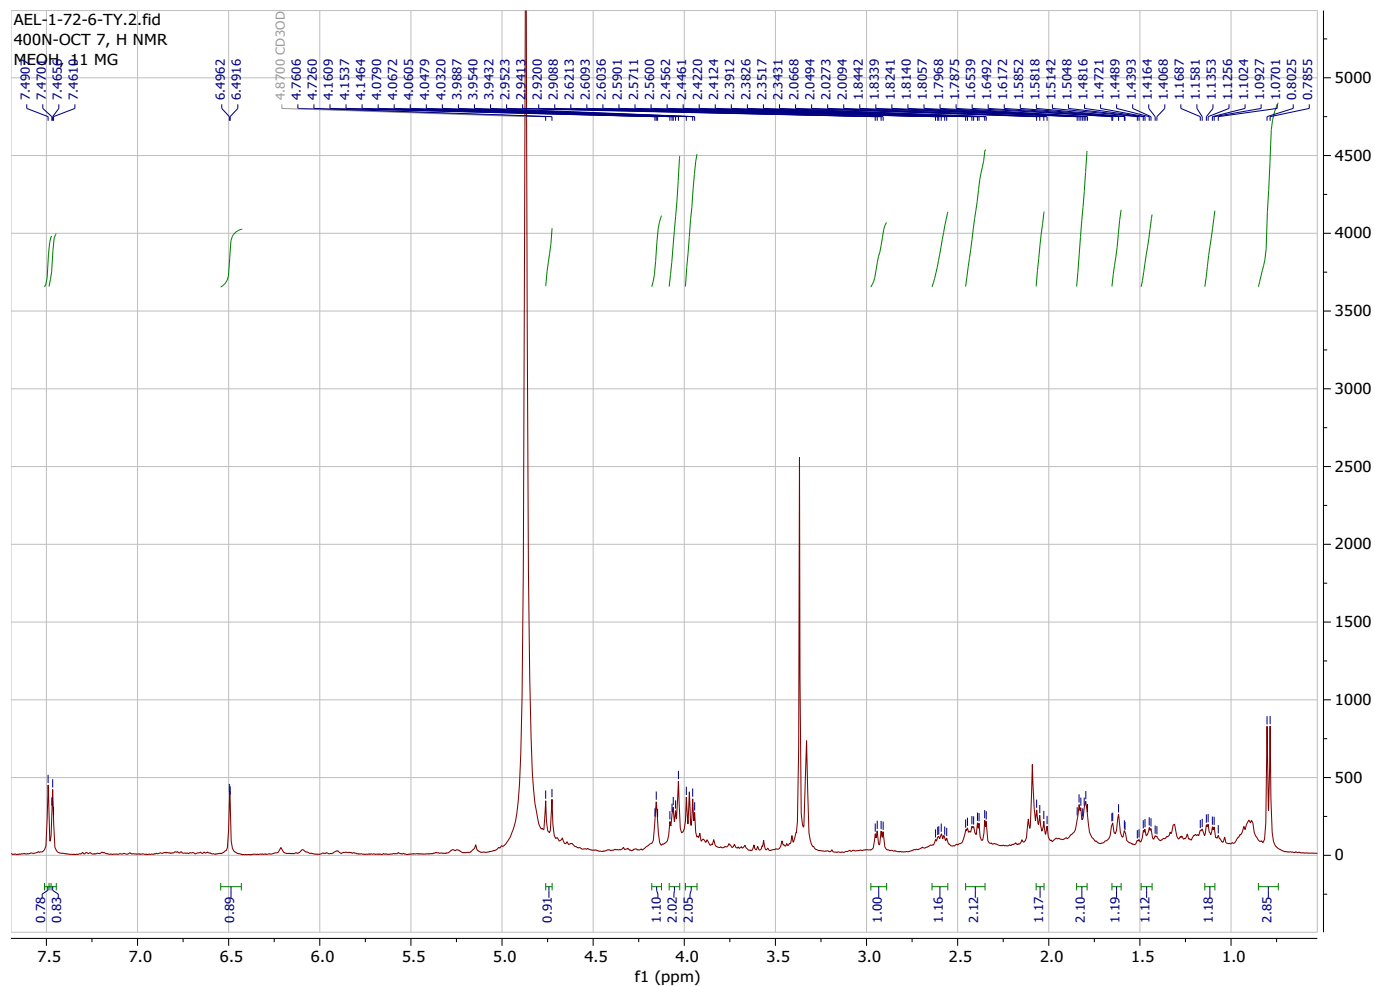

**Fig. S3.** DEPTQ spectrum of compound **1** (CD<sub>3</sub>OD, 100 MHz)

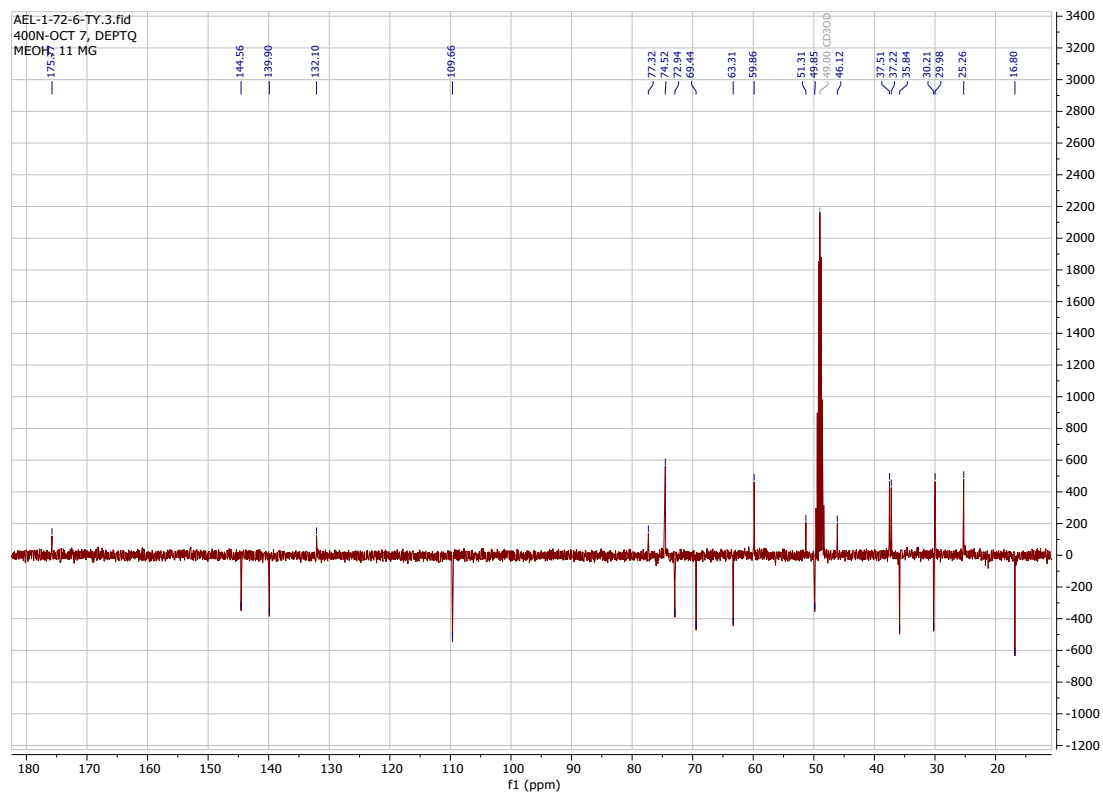

**Fig. S4.** <sup>1</sup>H-<sup>1</sup>H COSY spectrum of compound **1** (CD<sub>3</sub>OD, 400 MHz)

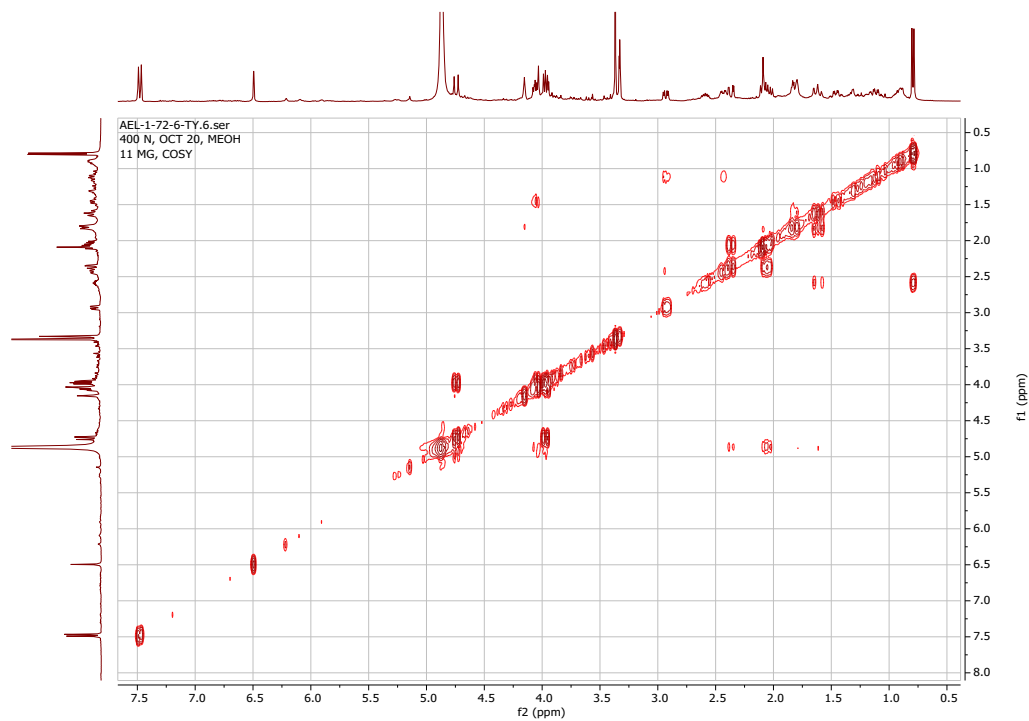

**Fig. S5.** HSQC spectrum of compound **1** (CD<sub>3</sub>OD, 400 MHz)

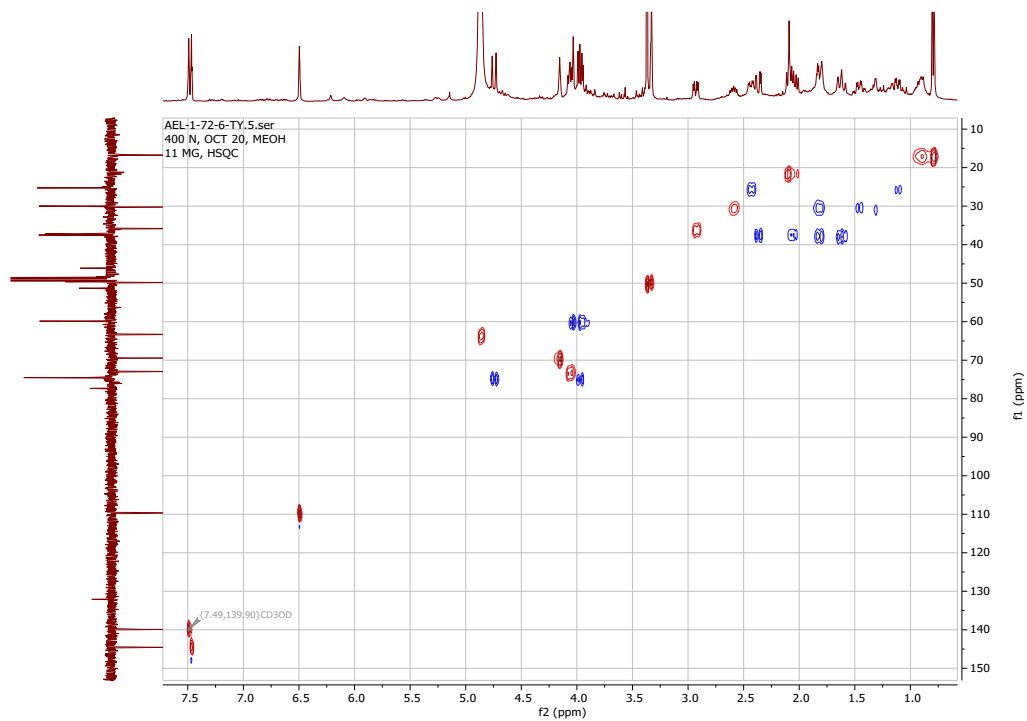

**Fig. S6.** HMBC spectrum of compound **1** (CD<sub>3</sub>OD, 400 MHz)

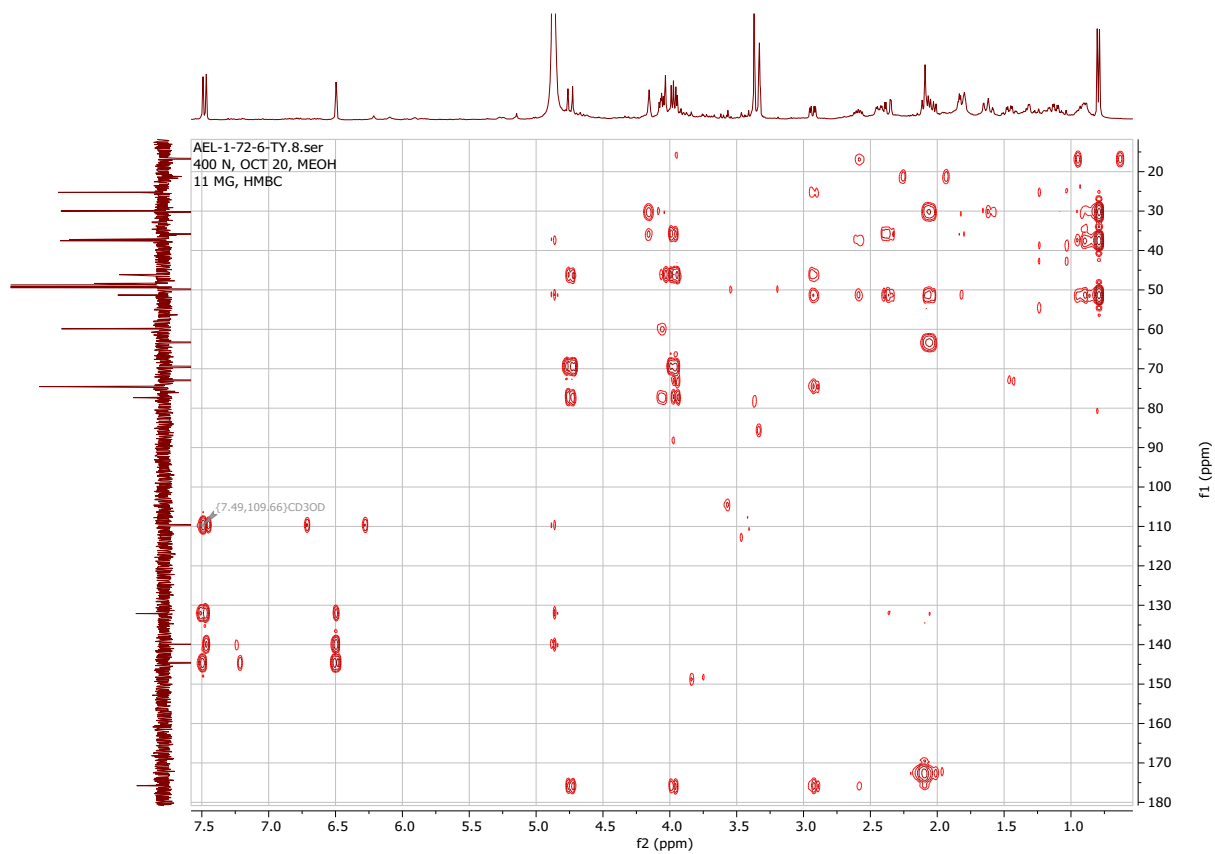

**Fig. S7.** NOESY spectrum of compound **1** (CD<sub>3</sub>OD, 400 MHz)

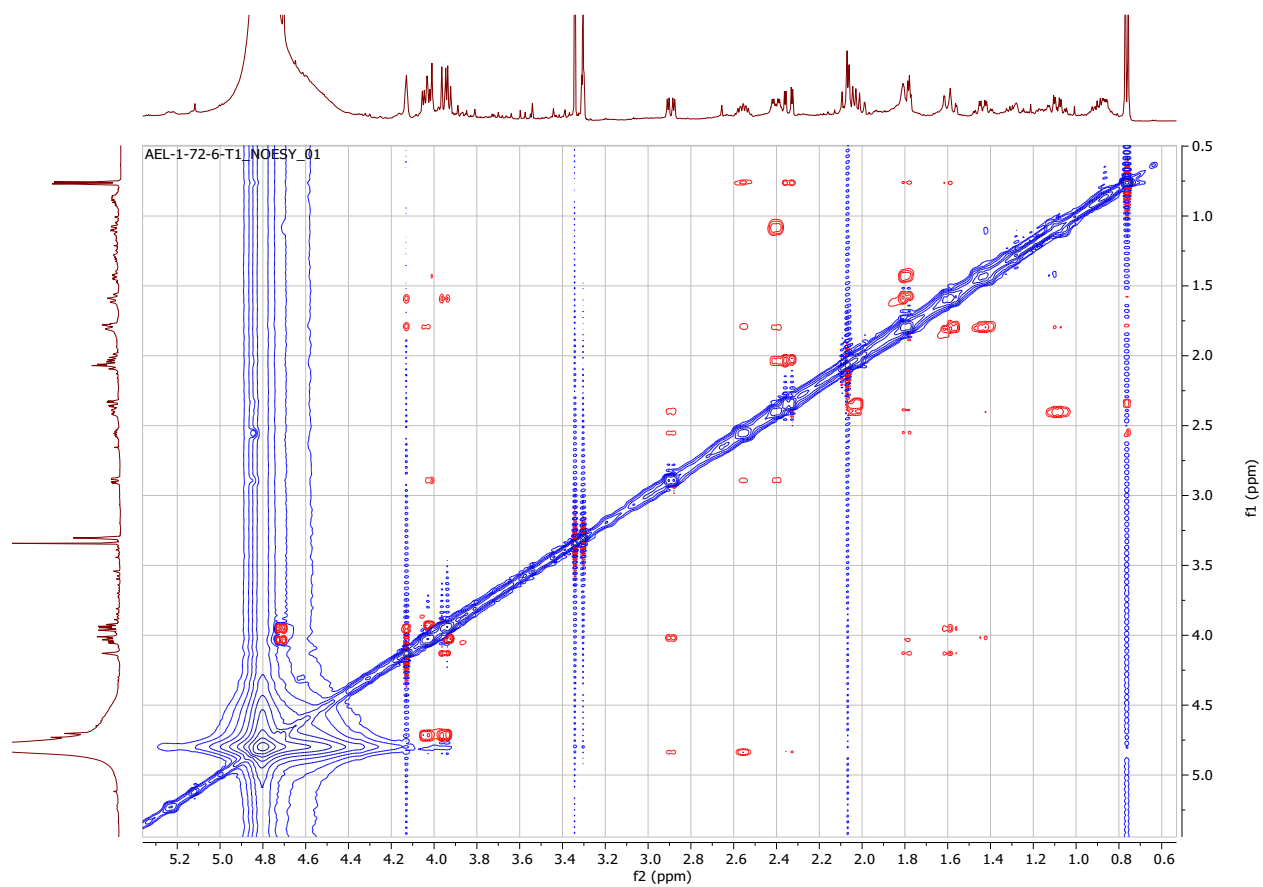

**Fig. S8.** IR spectrum of compound **1**

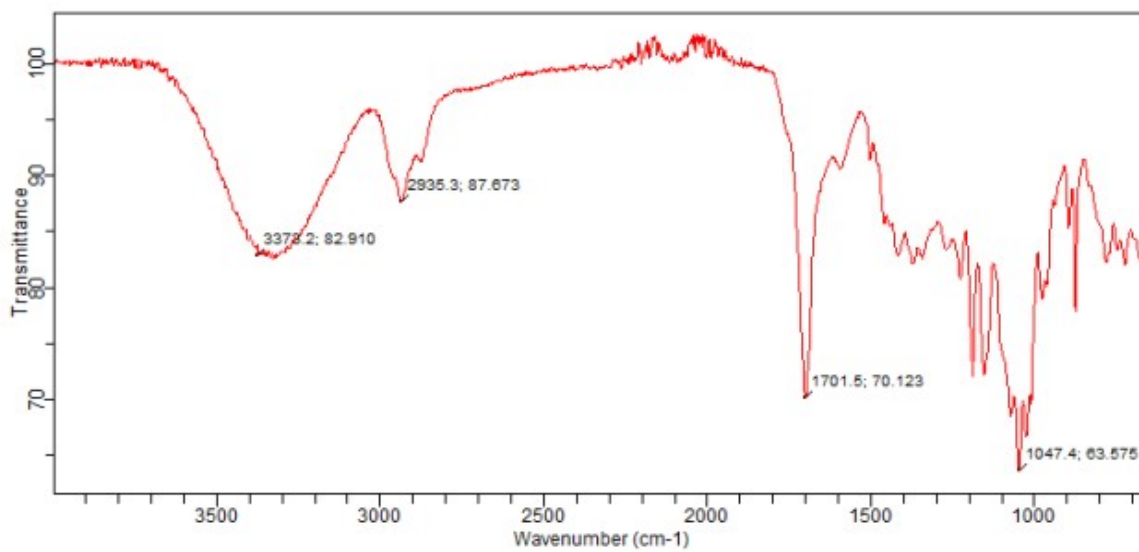

**Fig. S9.** HR-ESI-MS [M-H]<sup>-</sup> spectrum of compound **2**

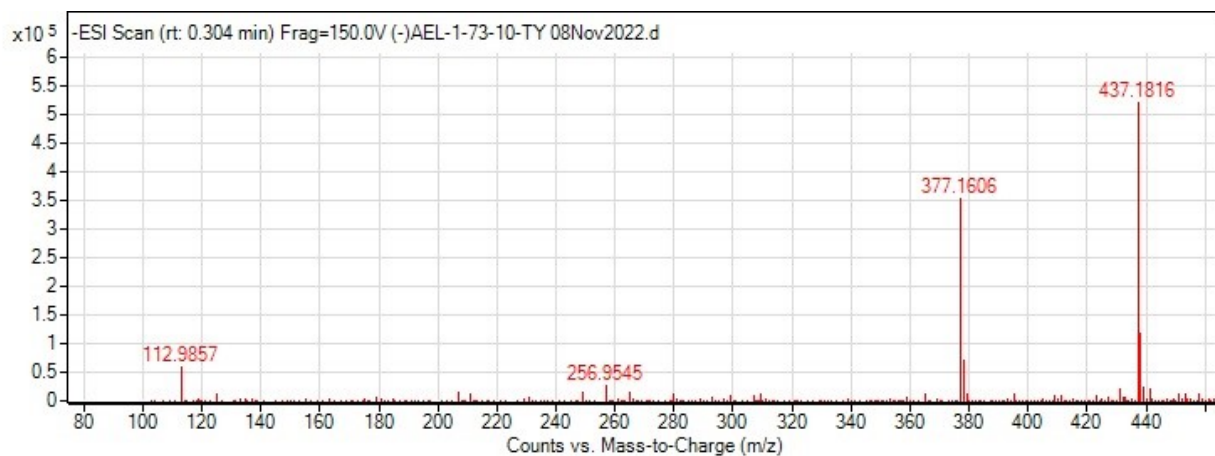

**Fig. S10.** <sup>1</sup>H-NMR spectrum of compound **2** (CD<sub>3</sub>OD, 400 MHz)

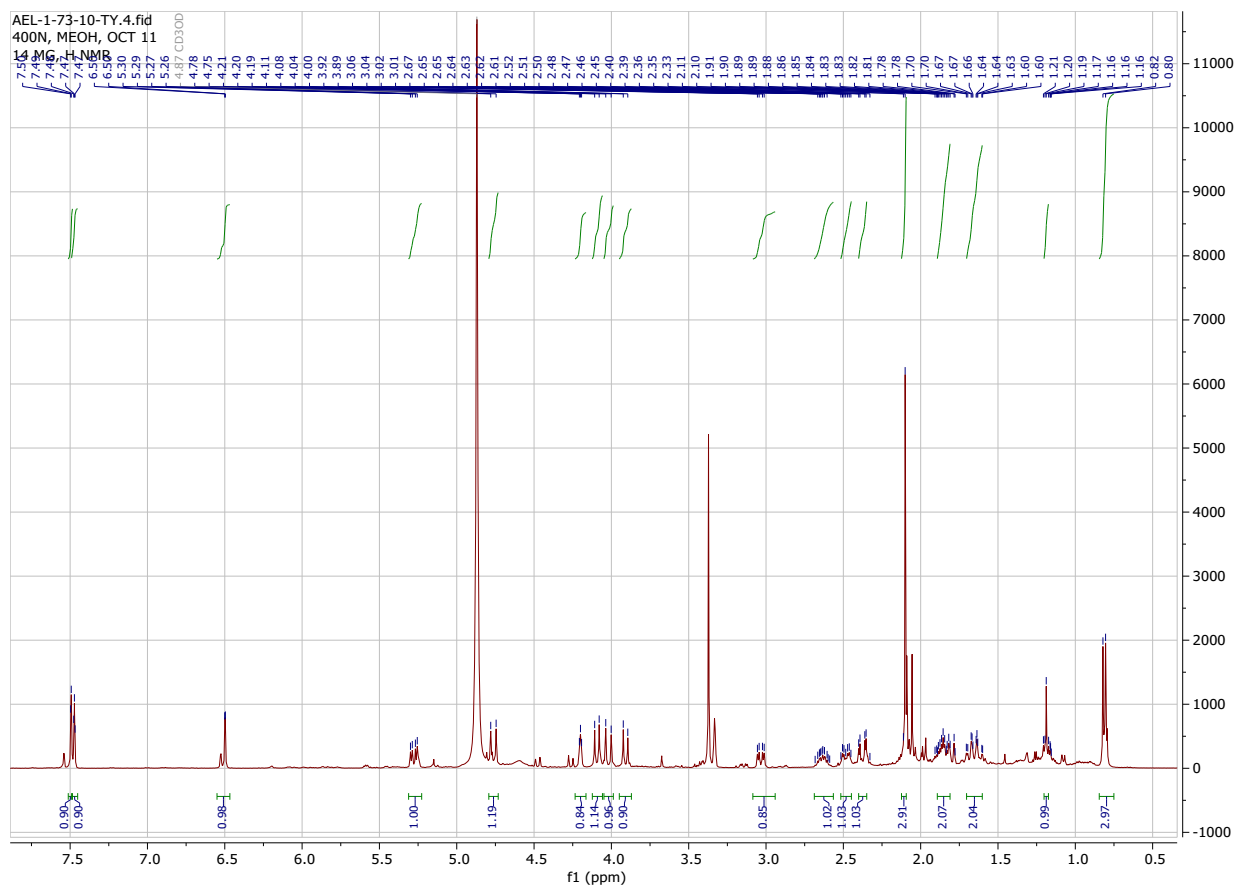

**Fig. S11.** DEPTQ spectrum of compound **2** (CD<sub>3</sub>OD, 100 MHz)

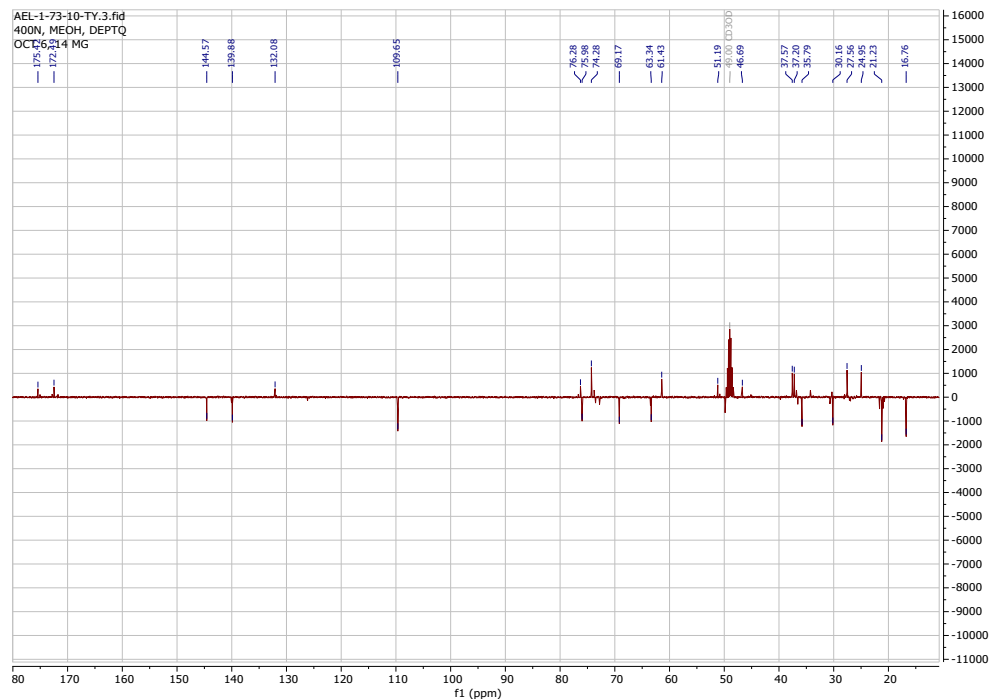

**Fig. S12.** <sup>1</sup>H-<sup>1</sup>H COSY spectrum of compound **2** (CD<sub>3</sub>OD, 400 MHz)

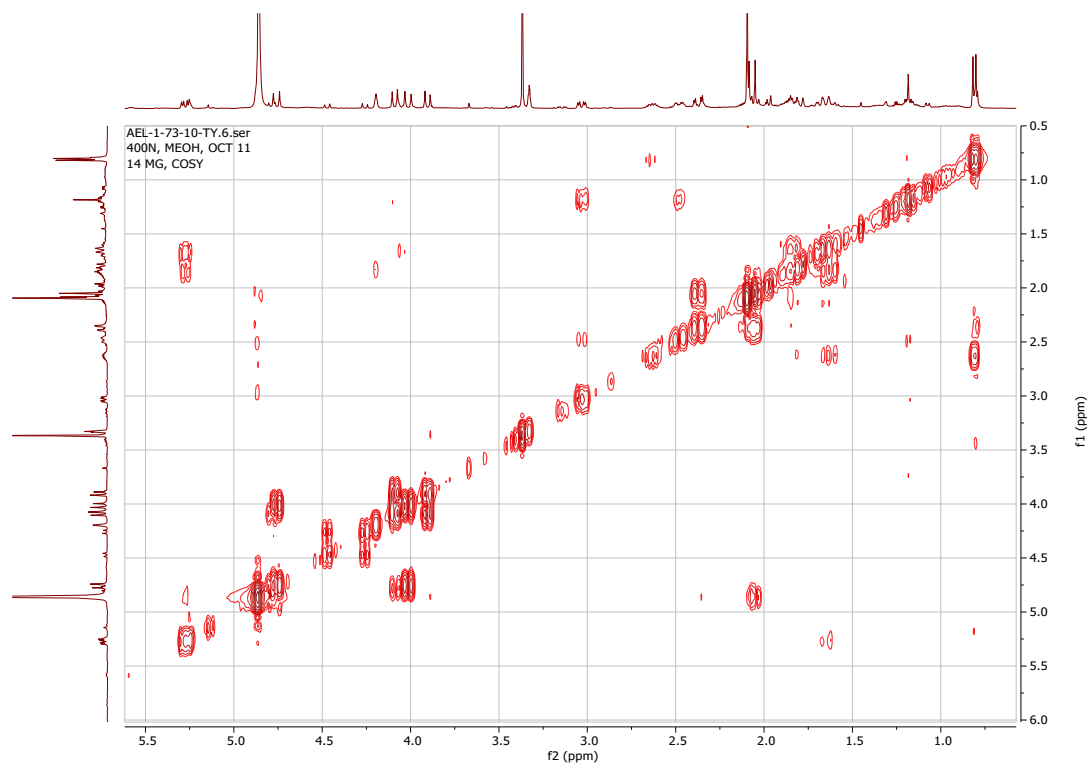



**Fig. S13.** HSQC spectrum of compound **2** (CD<sub>3</sub>OD, 400 MHz)

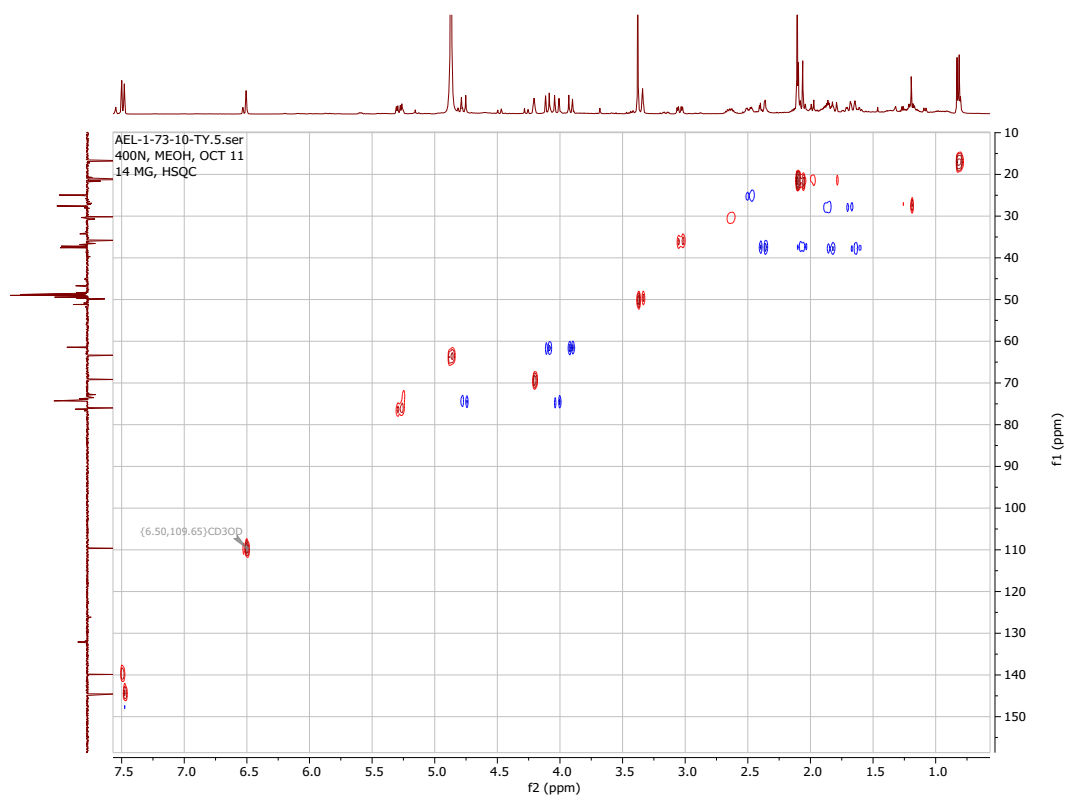

**Fig. S14.** HMBC spectrum of compound **2** (CD<sub>3</sub>OD, 400 MHz)

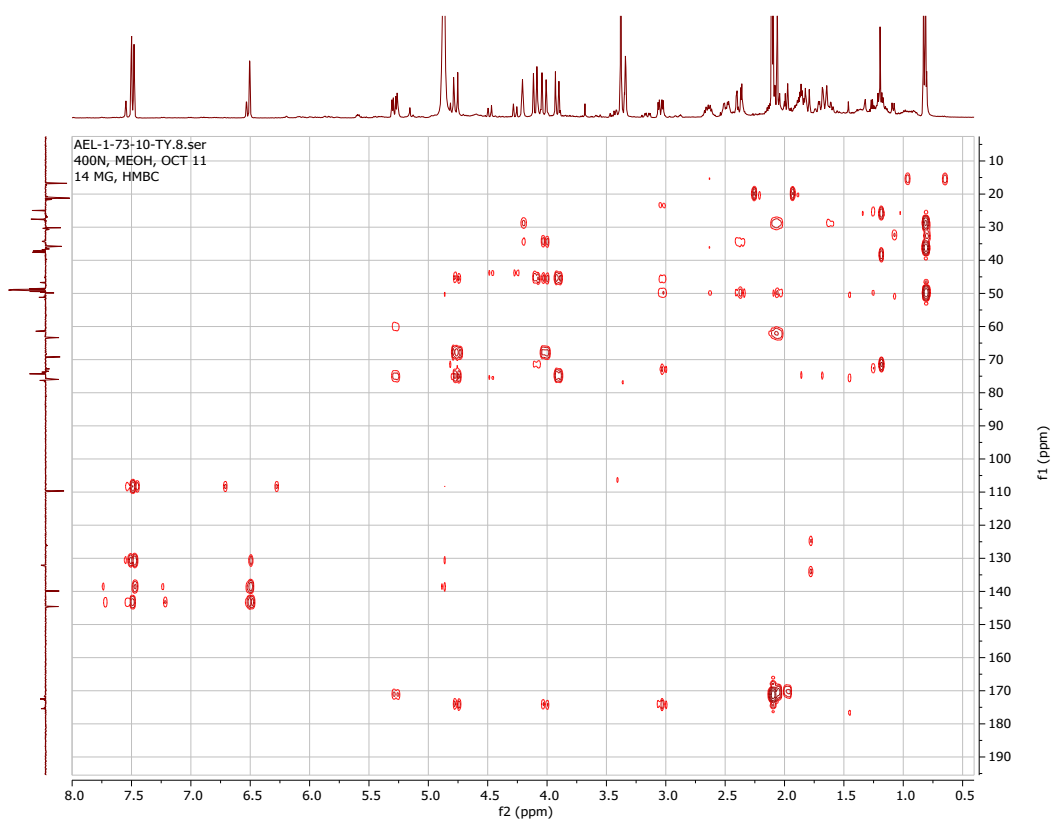

**Fig. S15.** NOESY spectrum of compound **2** (CD<sub>3</sub>OD, 400 MHz)

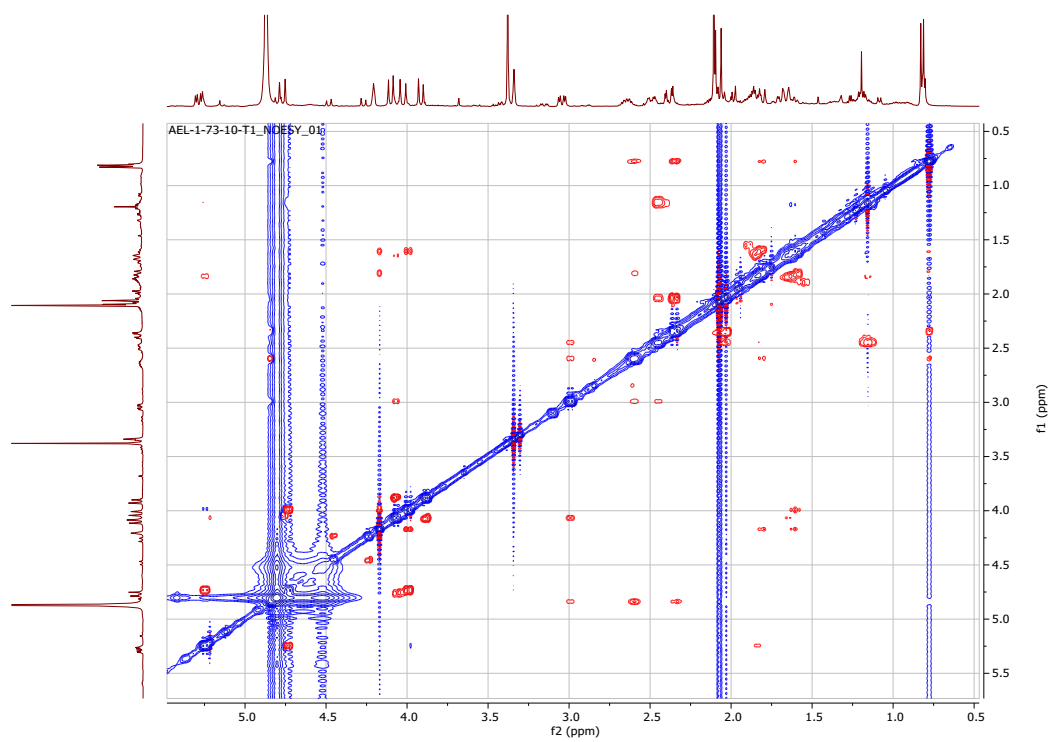

**Fig. S16.** IR spectrum of compound **2**

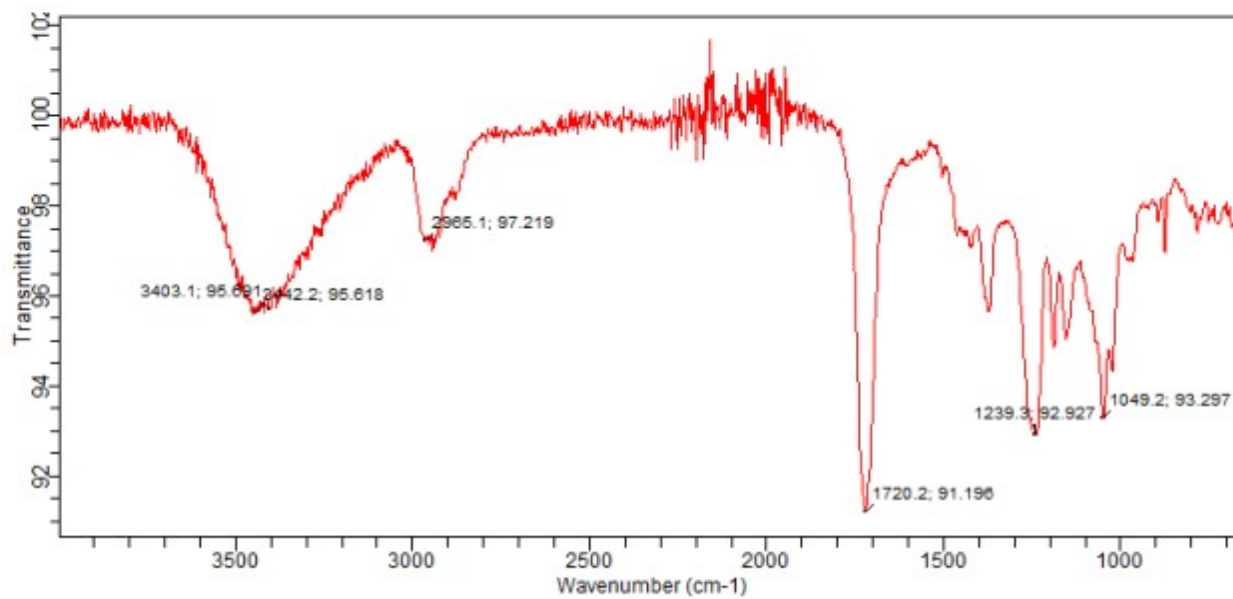

**Fig. S17.** HR-ESI-MS  $[M-H]^-$  spectrum of compound **3**

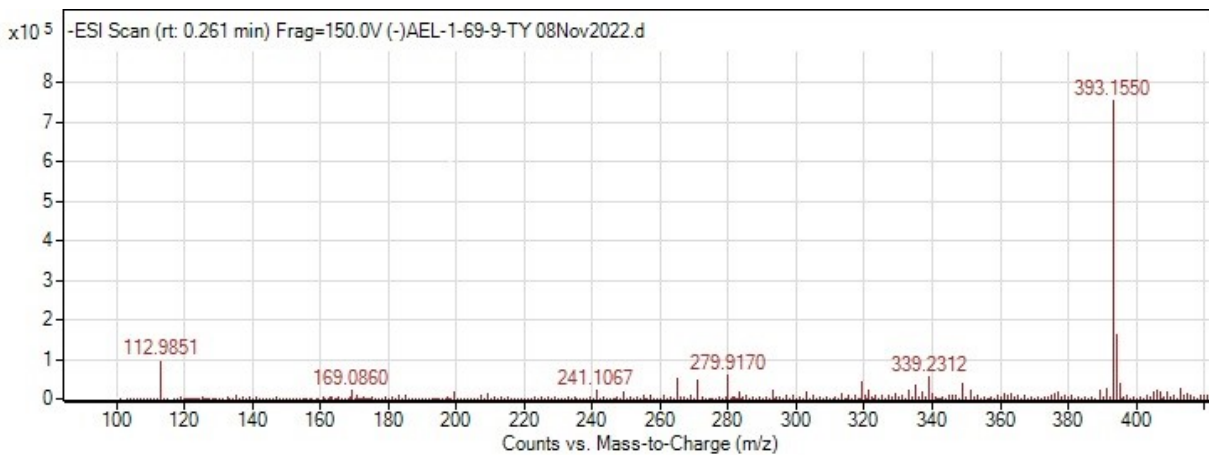

**Fig. S18.**  $^1H$ -NMR spectrum of compound **3** ( $CD_3OD$ , 400 MHz)

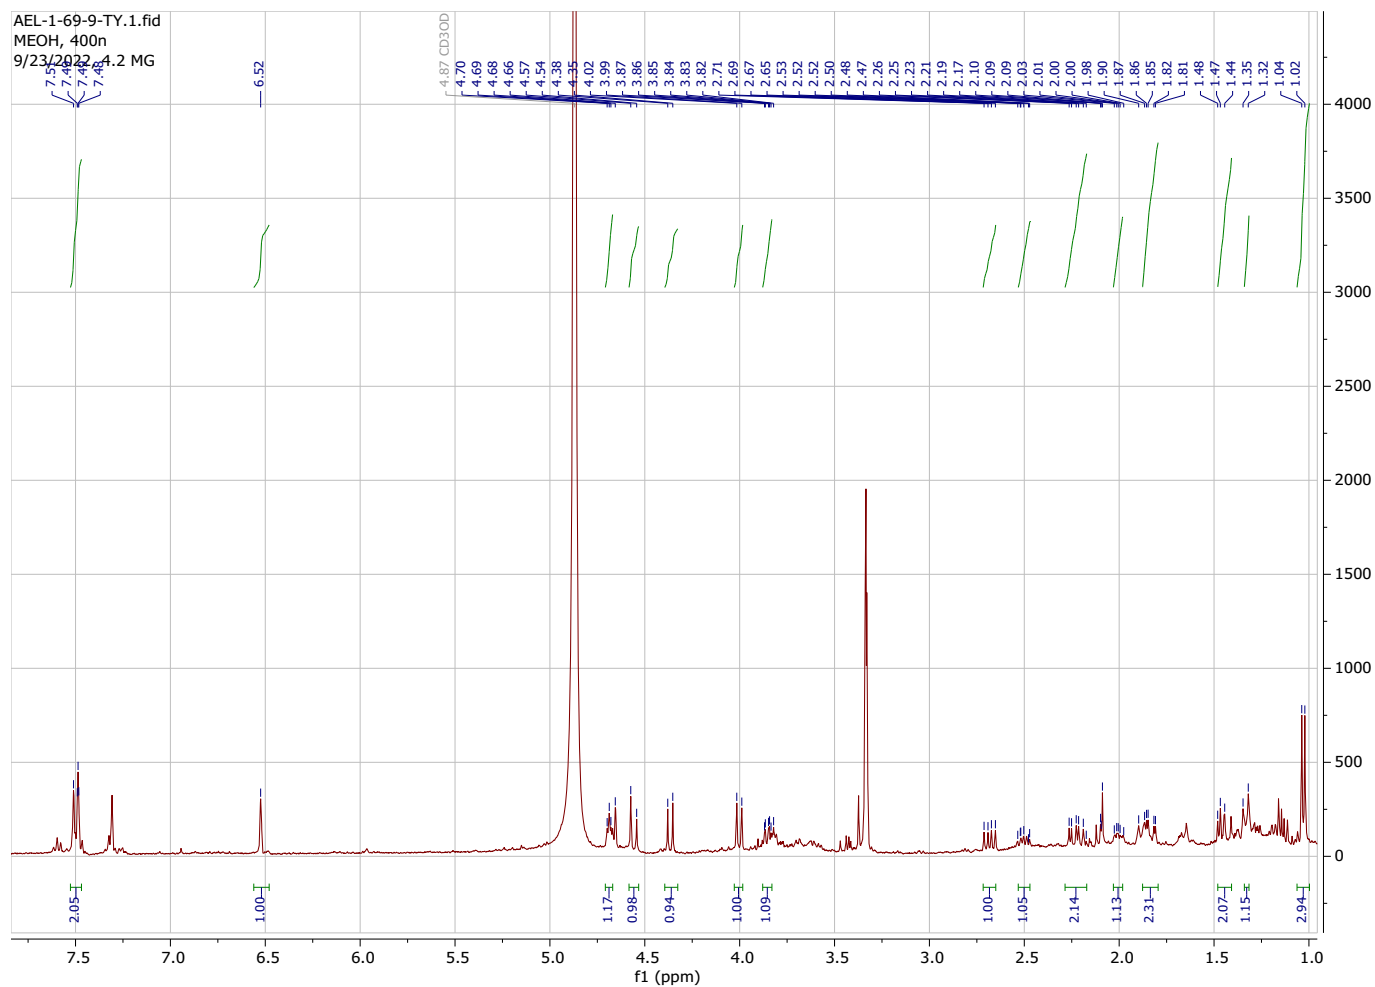

**Fig. S19.** DEPTQ spectrum of compound **3** (CD<sub>3</sub>OD, 100 MHz)

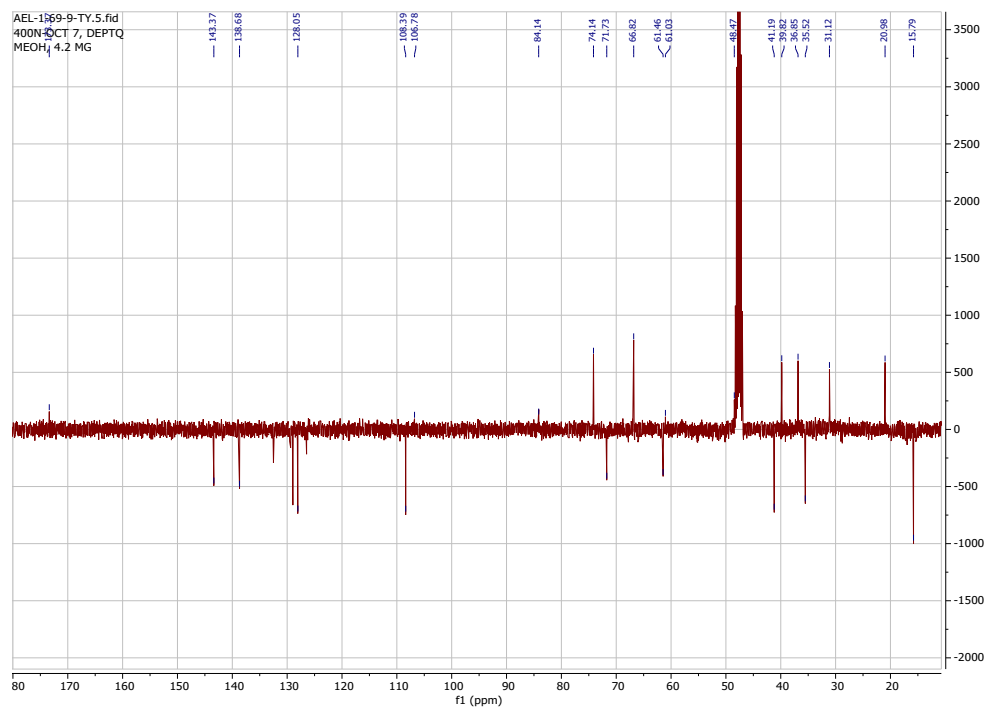

**Fig. S20.** <sup>1</sup>H-<sup>1</sup>H COSY spectrum of compound **3** (CD<sub>3</sub>OD, 400 MHz)

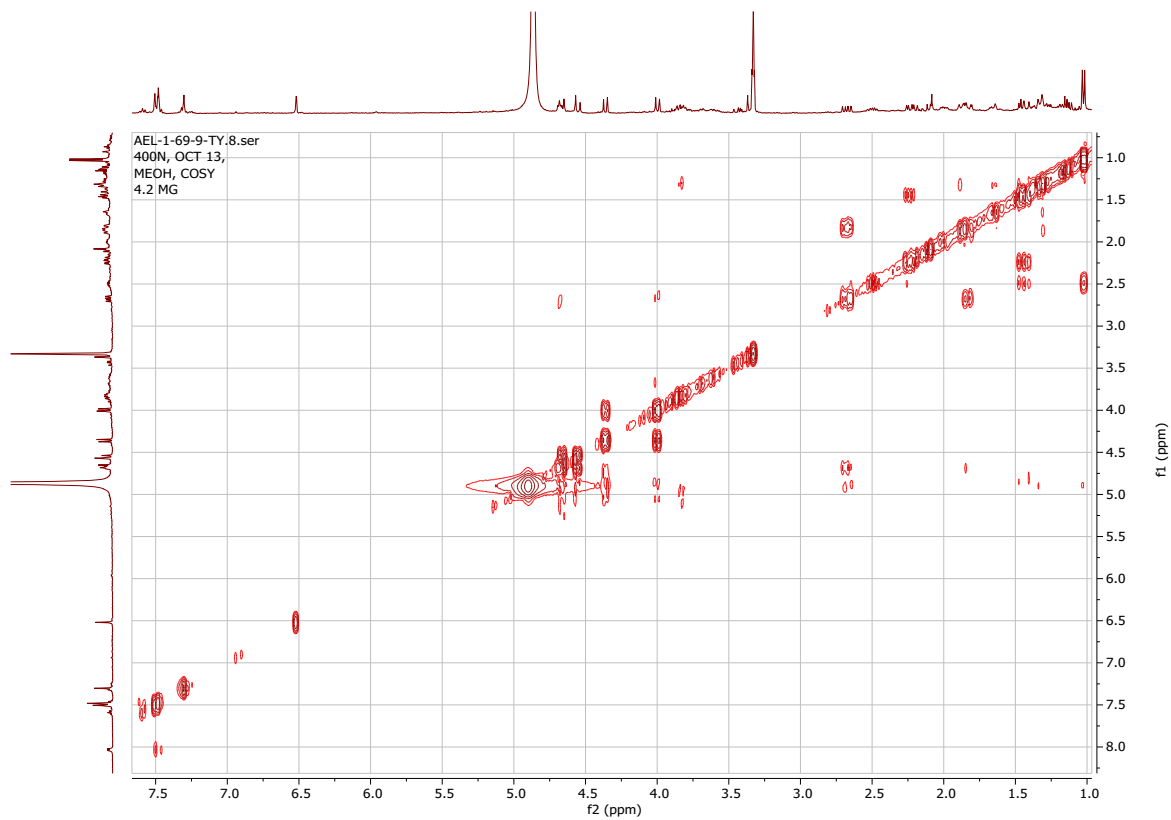

**Fig. S21.** HSQC spectrum of compound **3** (CD<sub>3</sub>OD, 400 MHz)

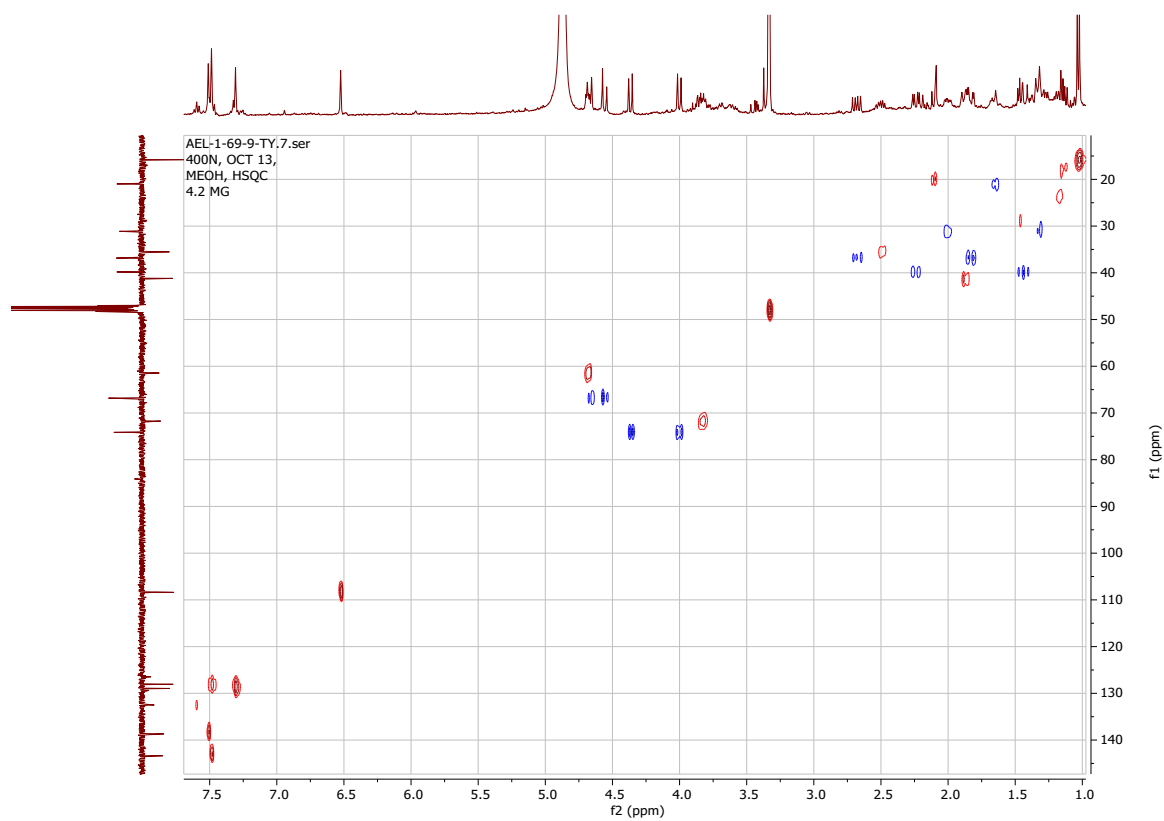

**Fig. S22.** HMBC spectrum of compound **3** (CD<sub>3</sub>OD, 400 MHz)

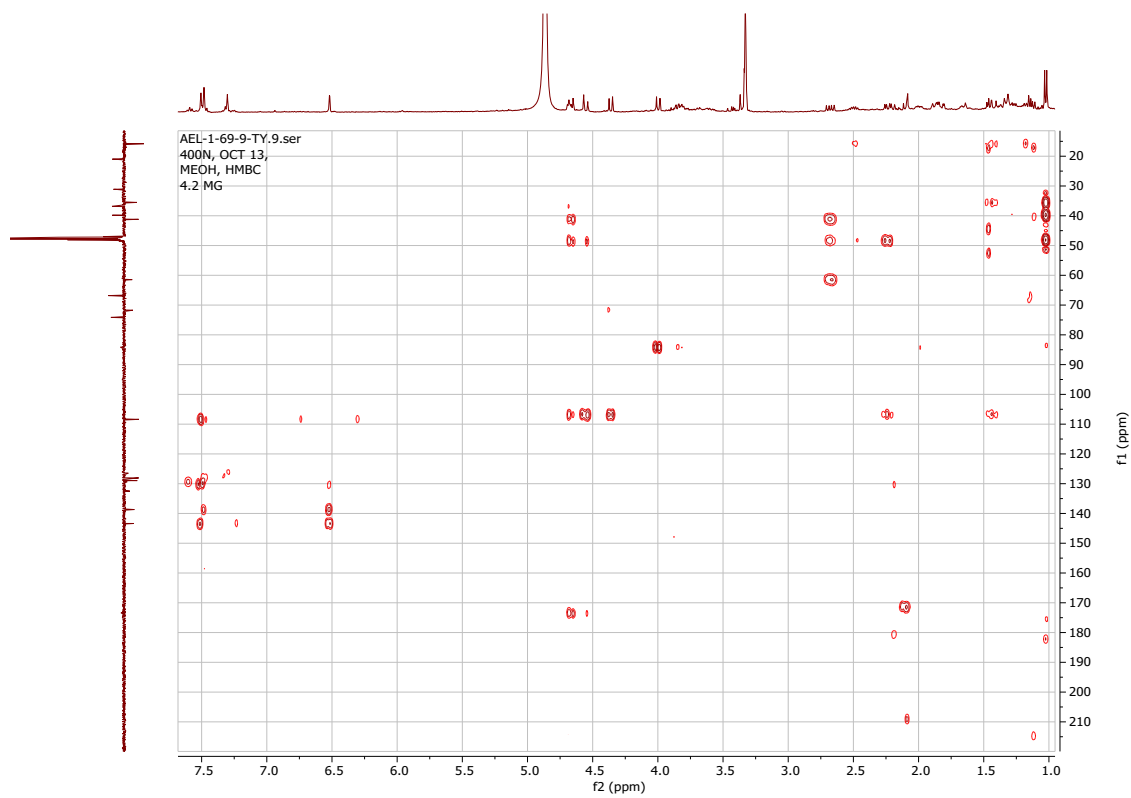

**Fig. S23.** HR-ESI-MS [M-H]<sup>-</sup> spectrum of compound 4

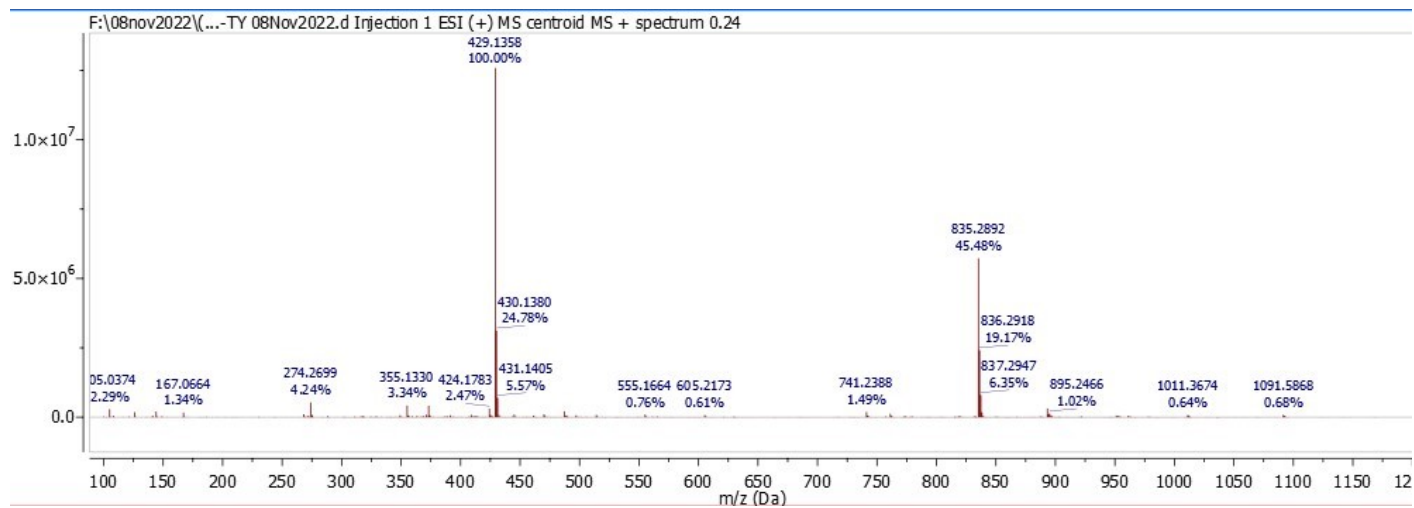

**Fig. S24.** <sup>1</sup>H-NMR spectrum of compound 4 (CD<sub>3</sub>OD, 400 MHz)

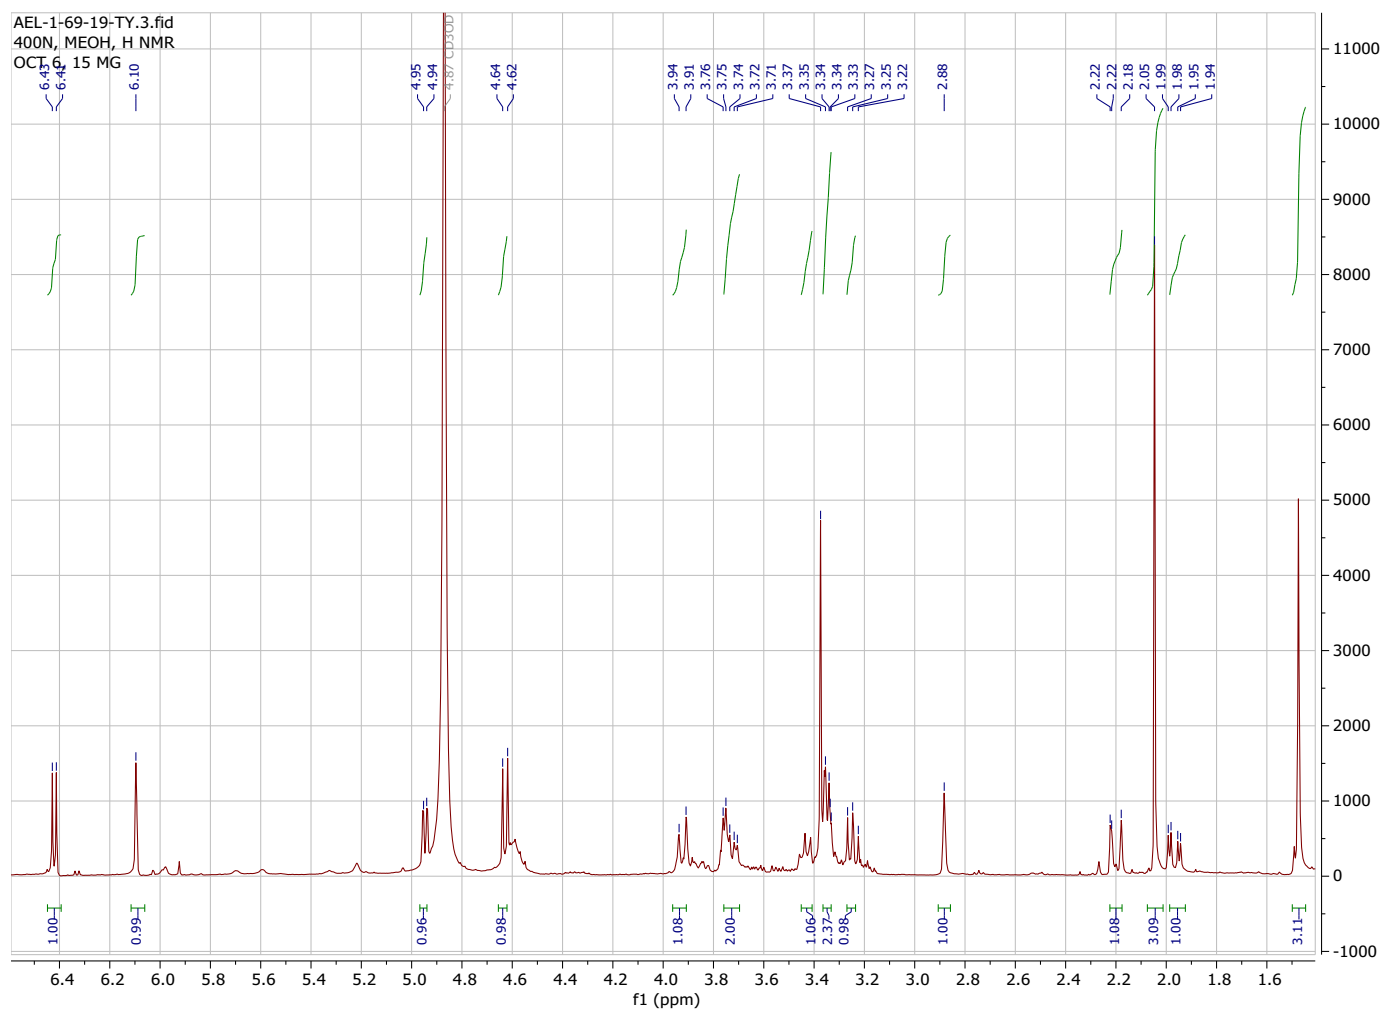

**Fig. S25.** DEPTQ spectrum of compound 4 (CD<sub>3</sub>OD, 100 MHz)

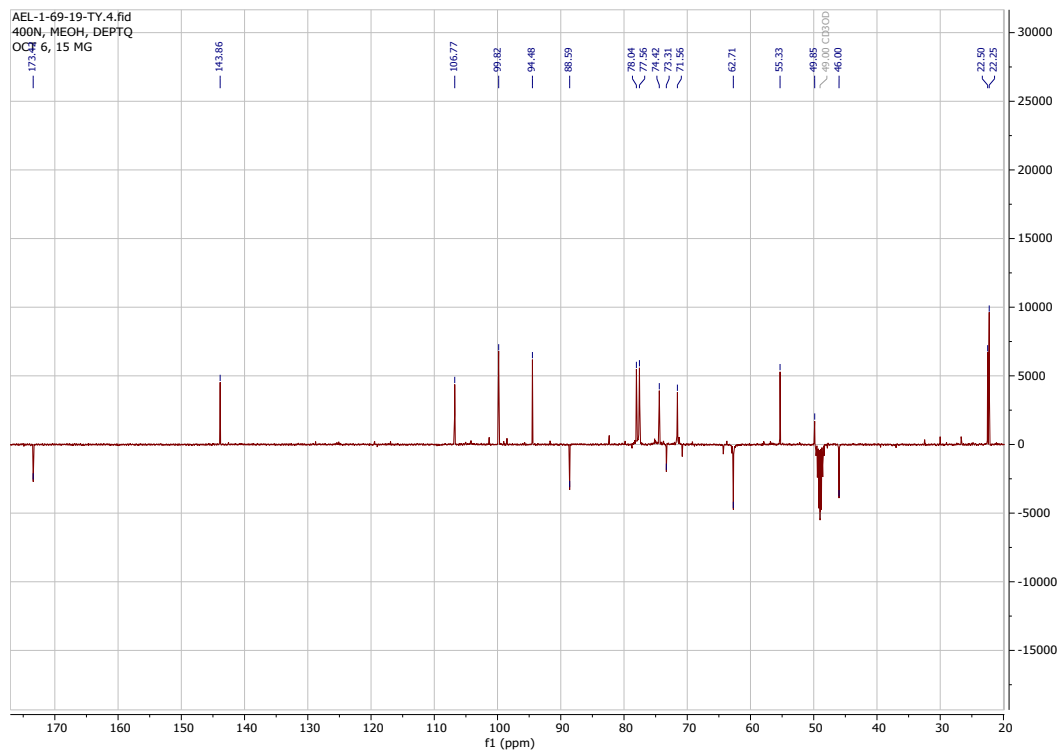

**Fig. S26.** HR-ESI+MS [M+Na]<sup>+</sup> spectrum of compound 5

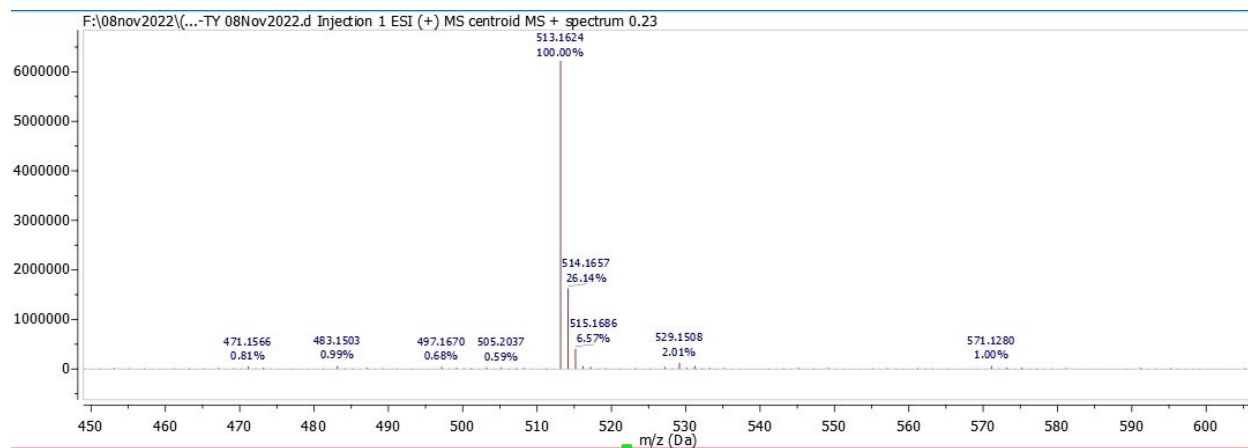

**Fig. S27.**  $^1\text{H-NMR}$  spectrum of compound **5** ( $\text{CD}_3\text{OD}$ , 400 MHz)

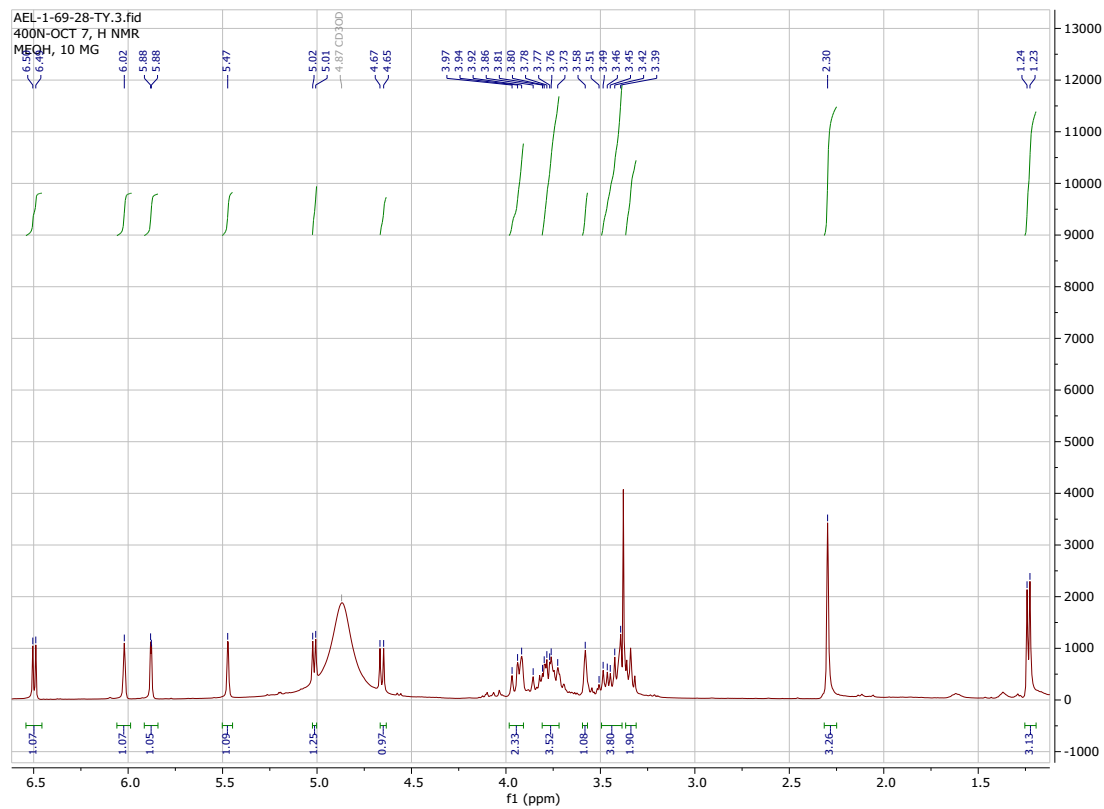

**Fig. S28.** DEPTQ spectrum of compound **5** ( $\text{CD}_3\text{OD}$ , 100 MHz)

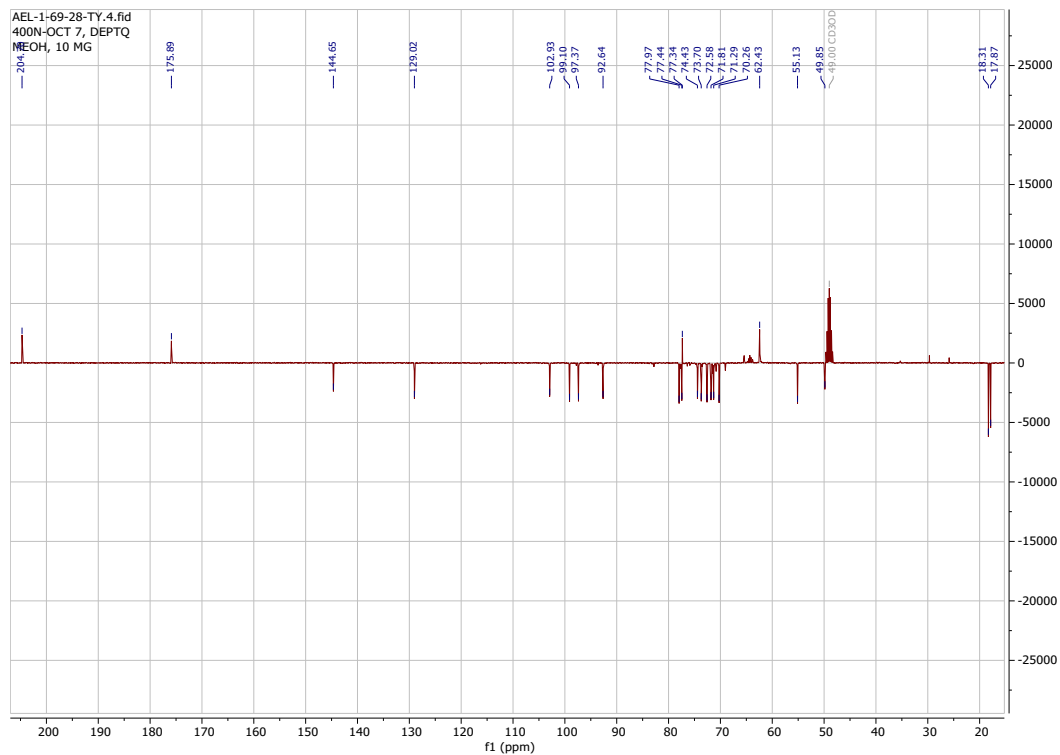



**Fig. S29.**  $^1\text{H}$ - $^1\text{H}$  COSY spectrum of compound **5** ( $\text{CD}_3\text{OD}$ , 400 MHz)

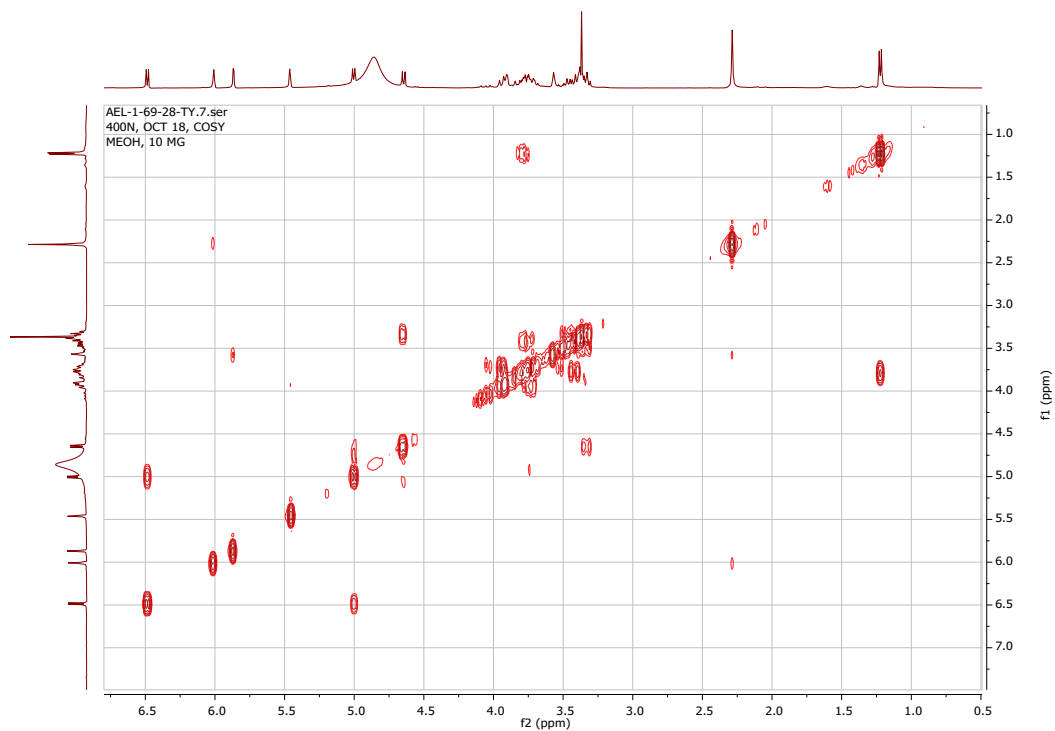

**Fig. S30.** HSQC spectrum of compound **5** ( $\text{CD}_3\text{OD}$ , 400 MHz)

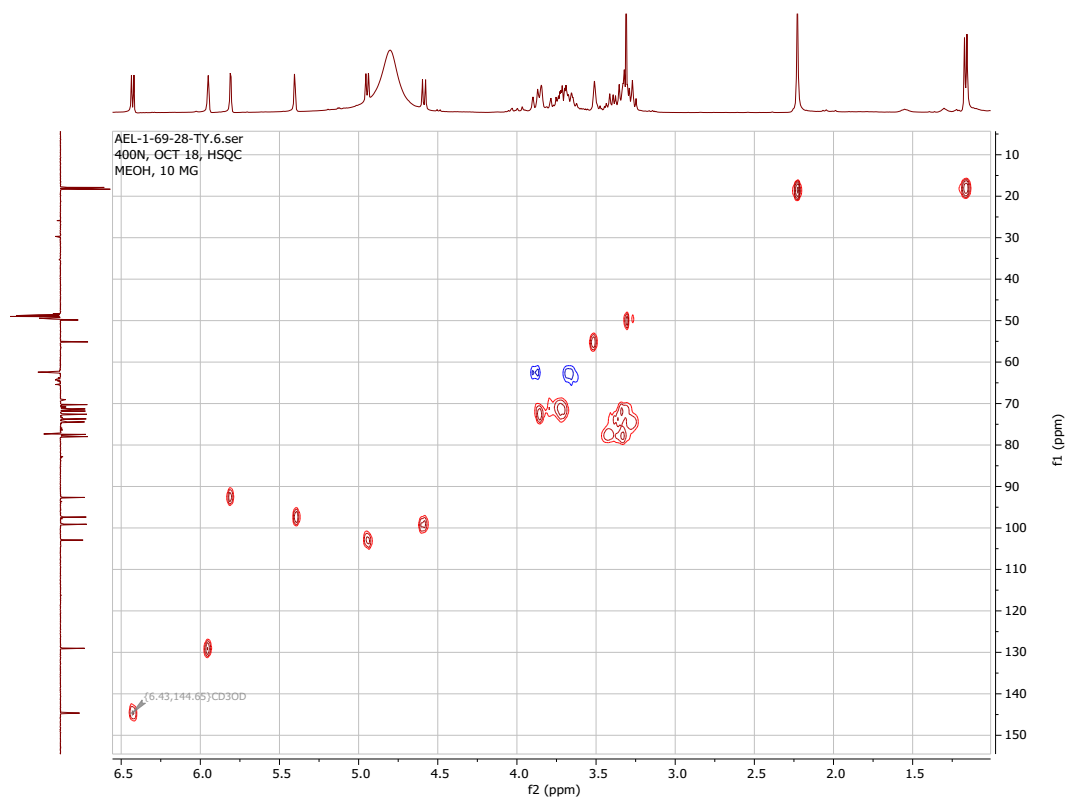

**Fig. S31.** HMBC spectrum of compound **5** (CD<sub>3</sub>OD, 400 MHz)

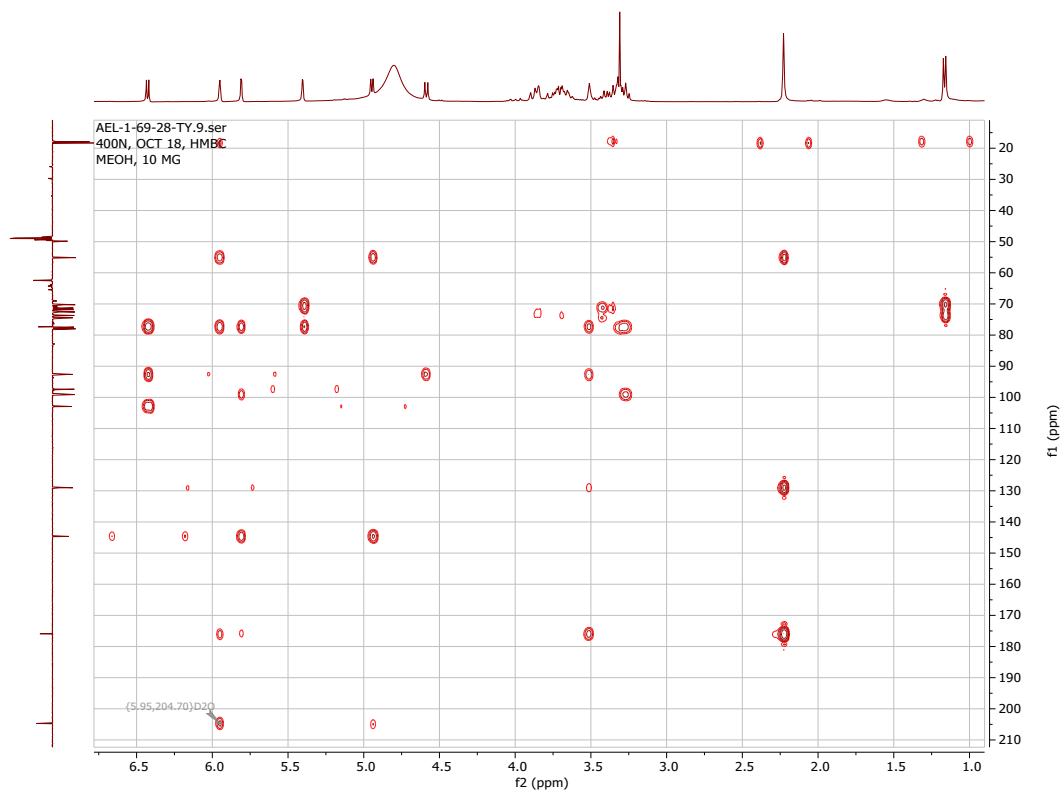

**Fig. S32.** Schematic isolation of compounds 1-5 from the aerial parts of *T. yemense*

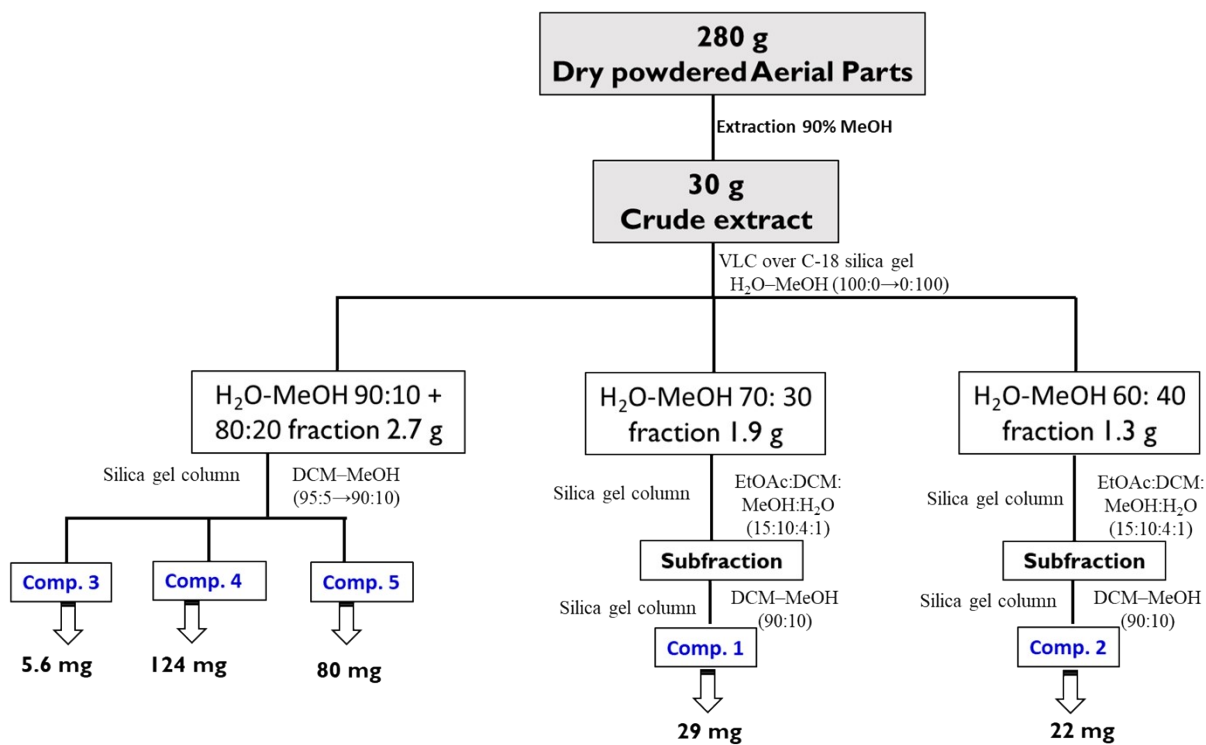

**Fig. S33.** HPLC chromatograms of compounds 1 and 2

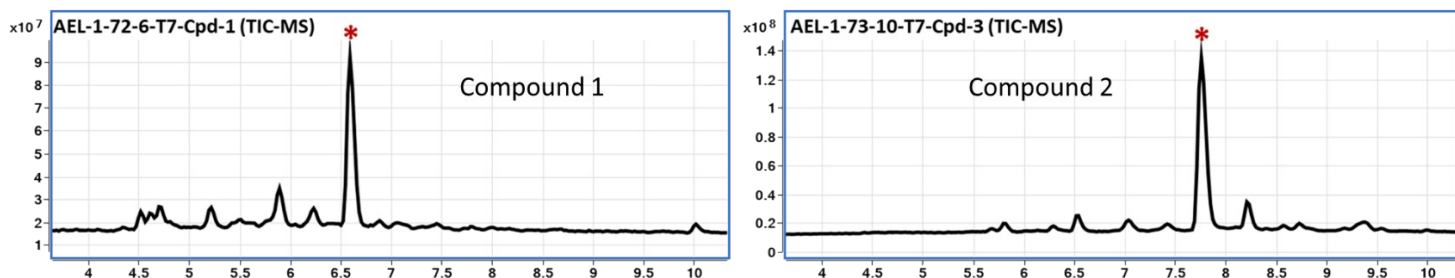

**Fig. S34.** Experimental ECD spectrum of compound 1

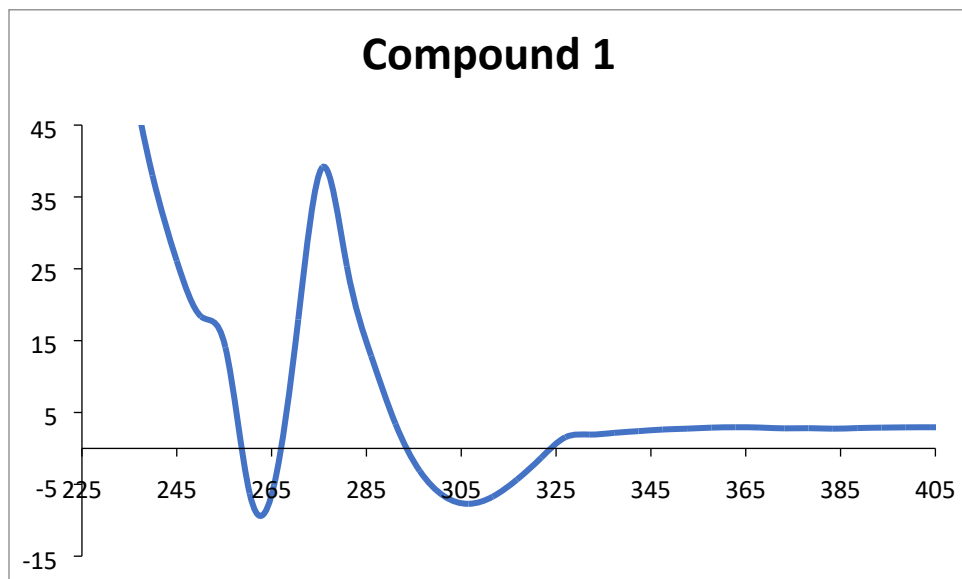

**Fig. S35.** Experimental ECD spectrum of compound 2

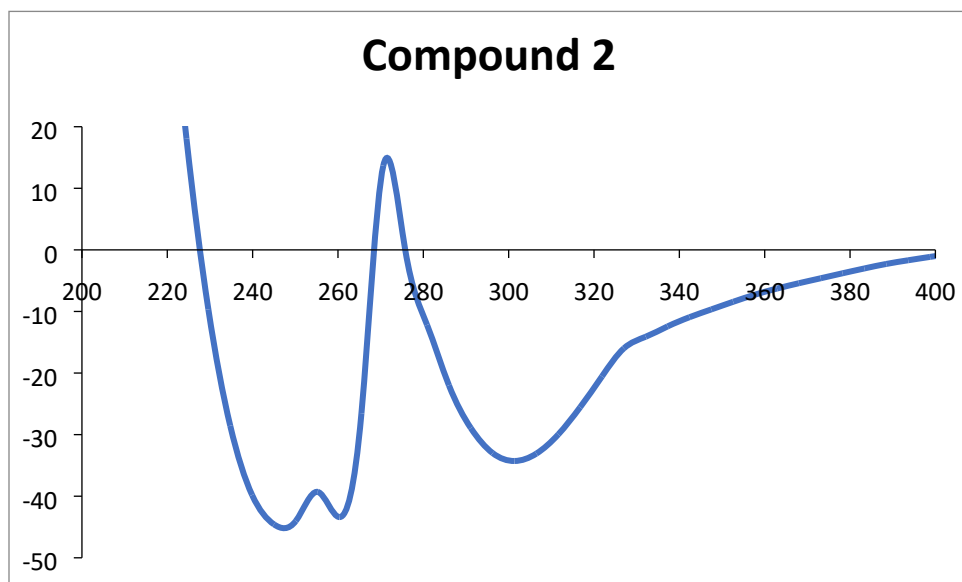

Supplement: d3ra06083g1.pdf [file d3ra06083g1.pdf]
